# Supplementary material for: HIV-1 requires Arf6-mediated membrane dynamics to efficiently enter and infect T lymphocytes
Source: PubMed Central journal article supplement — Mol Biol Cell. 2011 Apr 15;22(8):1148–66. doi: 10.1091/mbc.E10-08-0722 (PMC3078069; doi:10.1091/mbc.e10-08-0722), 2011-04-15
Supplement: E10-08-0722_1.pdf [file E10-08-0722_1.pdf]

## Supplemental Data

### HIV-1 requires Arf6-mediated membrane dynamics to efficiently enter and infect T Lymphocytes

Laura García-Expósito<sup>\*,#</sup>, Jonathan Barroso-González<sup>\*,#</sup>, Isabel Puigdomènech<sup>†</sup>, José-David Machado<sup>\*</sup>, Julià Blanco<sup>†</sup> and Agustín Valenzuela-Fernández<sup>\*,‡</sup>

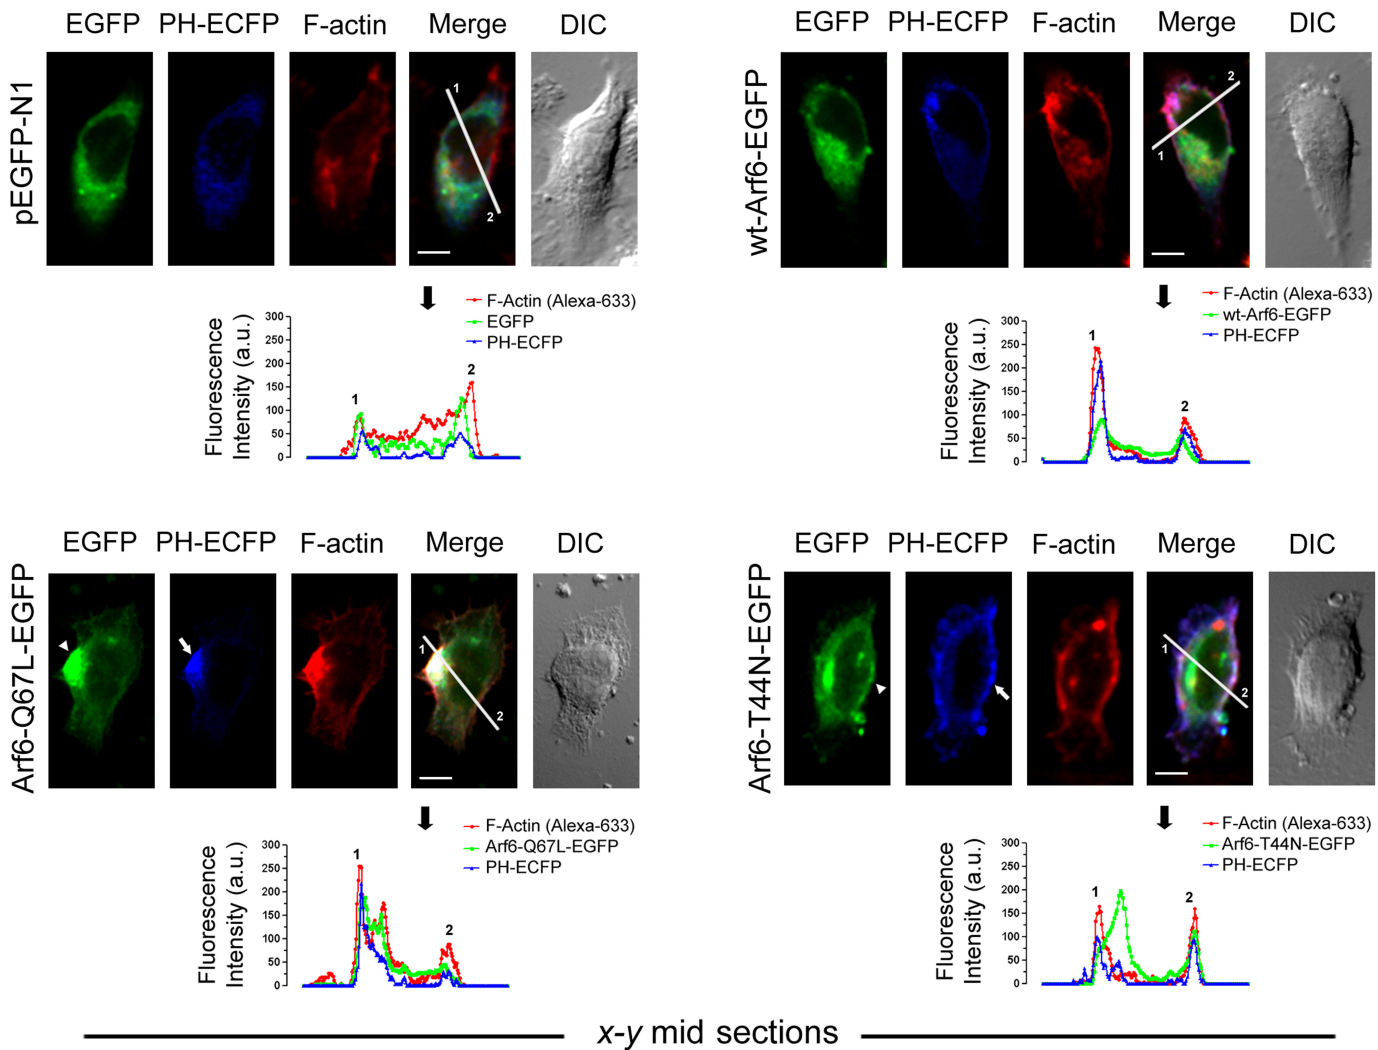

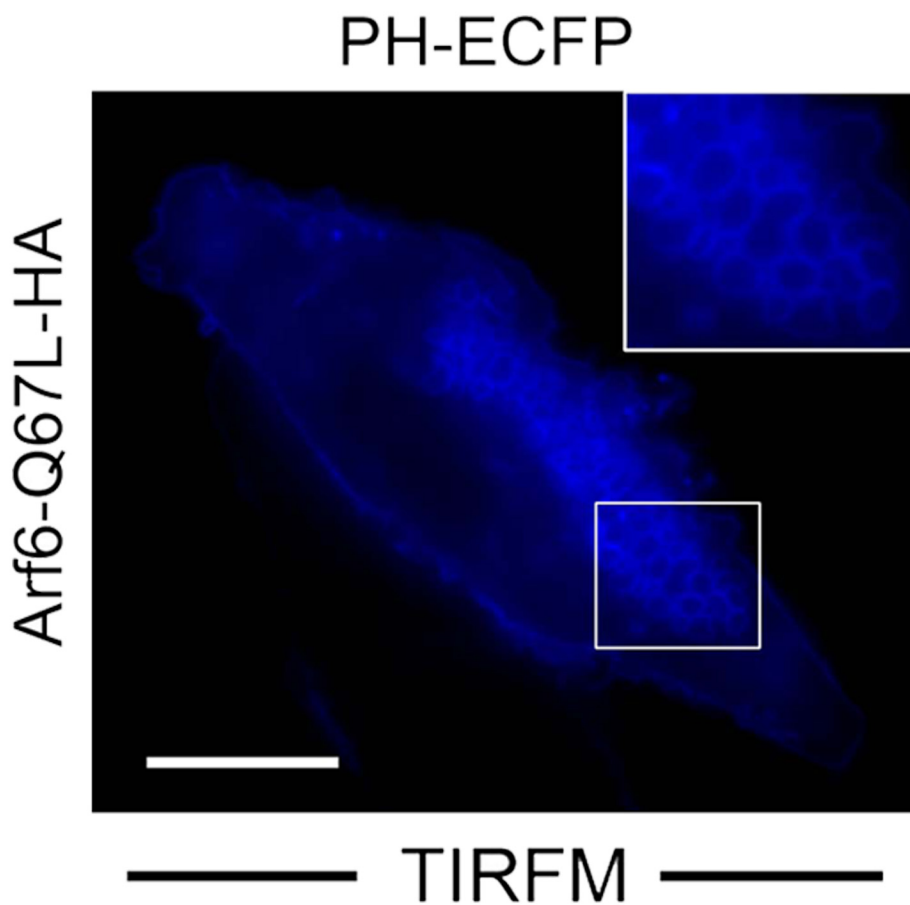

**Figure S2. Accumulation of  $\text{PIP}_2$ -associated vacuole-like structures near the plasma membrane provoked by the Arf6-Q67L-HA mutant.**

TIRFM analysis of  $\text{PIP}_2$ -associated vacuole-like structures accumulated at the EF of permissive TZMbl cells, transiently transfected with the Arf6-Q67L-HA mutant.

Top right square shows a zoom from the region indicated at the plasma membrane of the entire cell. Bar,  $5\mu\text{m}$ .

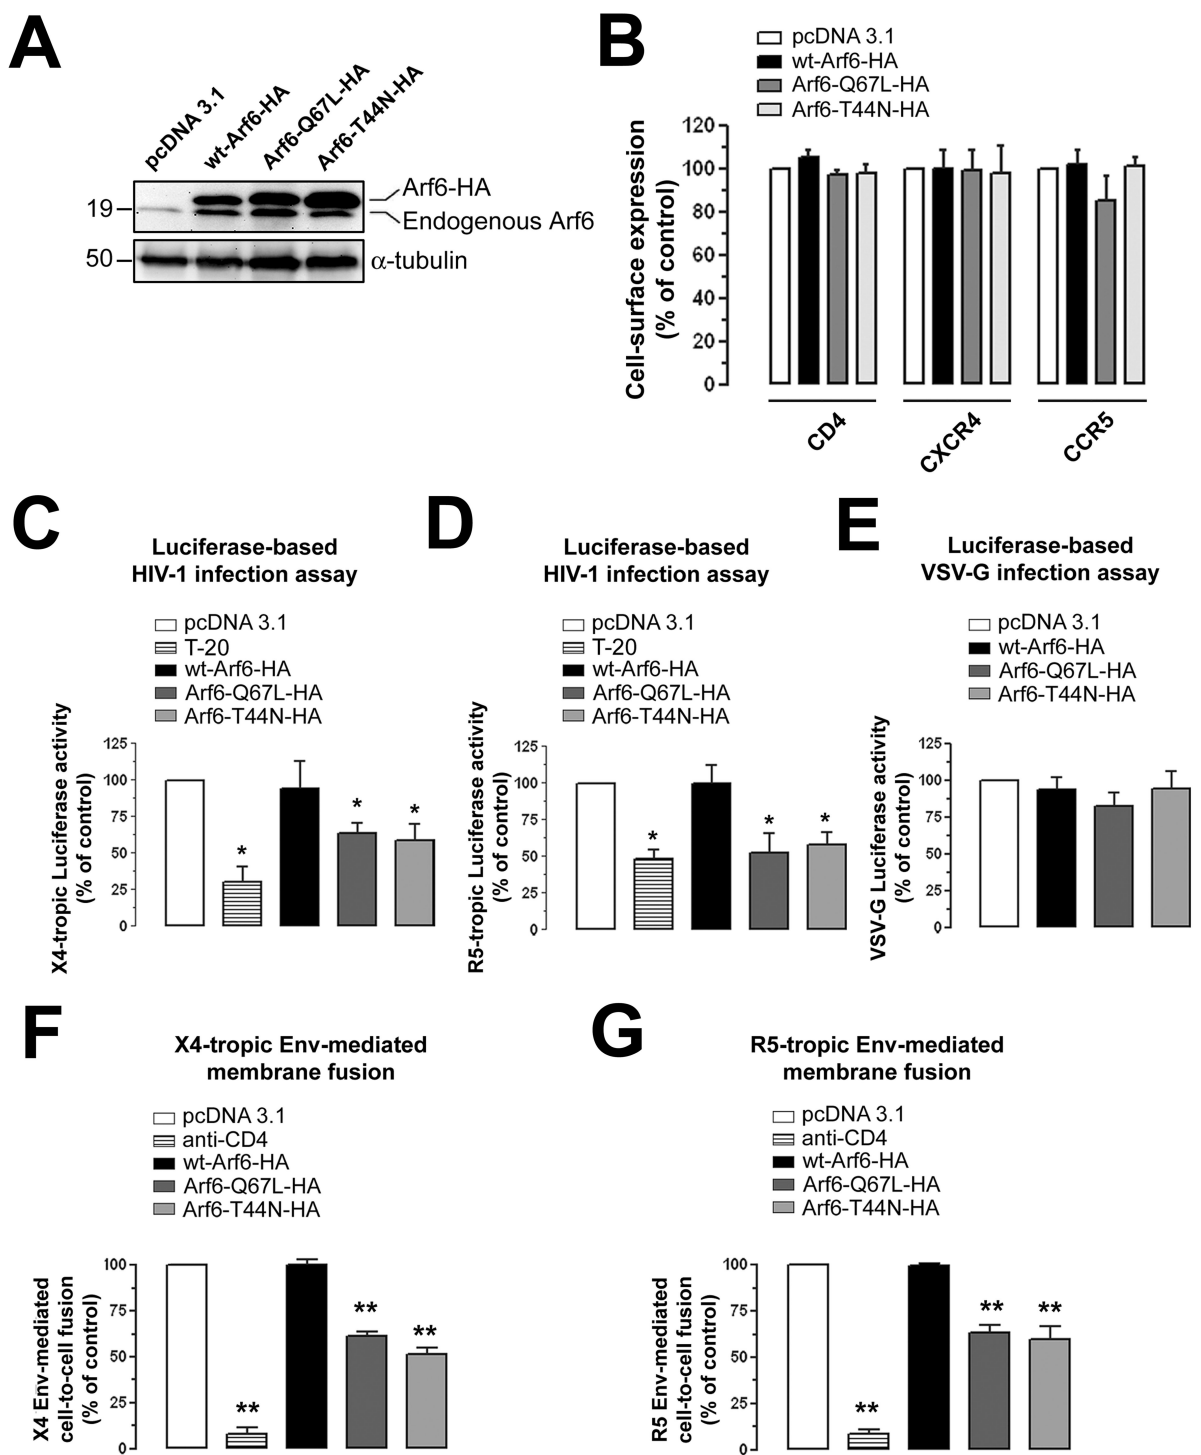

**Figure S3. Effect of Arf6-HA mutants on HIV-1 Env-mediated entry and infection, and membrane fusion in permissive HeLa cells.** (A) Western-blot analysis of endogenous Arf6, wt-Arf6-, Arf6-Q67L-, and Arf6-T44N-HA expression in HeLa-P5 cells.  $\alpha$ -tubulin and pcDNA3.1 are the controls for total protein and transfected cells, respectively. A representative experiment of three is shown. (B) Flow cytometry analysis of CD4, CXCR4 and CCR5 cell-surface expression in Arf6-HA-transfected HeLa-P5 cells. Data are mean  $\pm$  SEM,  $n = 9$ . (C and D) Luciferase-based assay of HIV-1 entry and infection by non-replicative X4- and R5-tropic viruses, respectively, in Arf6-HA-transfected HeLa-P5 cells (control, 100% viral entry and infection in pcDNA3.1-transfected cells). When indicated, viral infection was inhibited by the anti-fusogenic T-20 peptide in cells transfected with pcDNA3.1. Data are mean  $\pm$  SEM of three independent experiments carried out in triplicate. Asterisk indicates  $p < 0.05$ ,  $t$  test. (E) VSV-G virions from Luciferase HIV-1 vectors were used to control the specificity of Arf6 mutants-mediated effects on HIV-1 viral entry and infection (control, 100% viral entry and infection in pcDNA3.1-transfected cells). Values are mean  $\pm$  SEM,  $n=9$ . (F and G) Arf6-HA constructs effect on HIV-1 Env-mediated membrane fusion by X4- and R5-tropic Env, respectively (control, 100% HIV-1-Env-mediated membrane fusion with pcDNA3.1-transfected Env(-) cells). When indicated, cell-to-cell fusion was inhibited by a neutralizing anti-CD4 mAb and using pcDNA3.1-transfected Env(-) cells. Values are mean  $\pm$  SEM,  $n=9$ . Asterisks indicates  $p < 0.01$ ,  $t$  test.

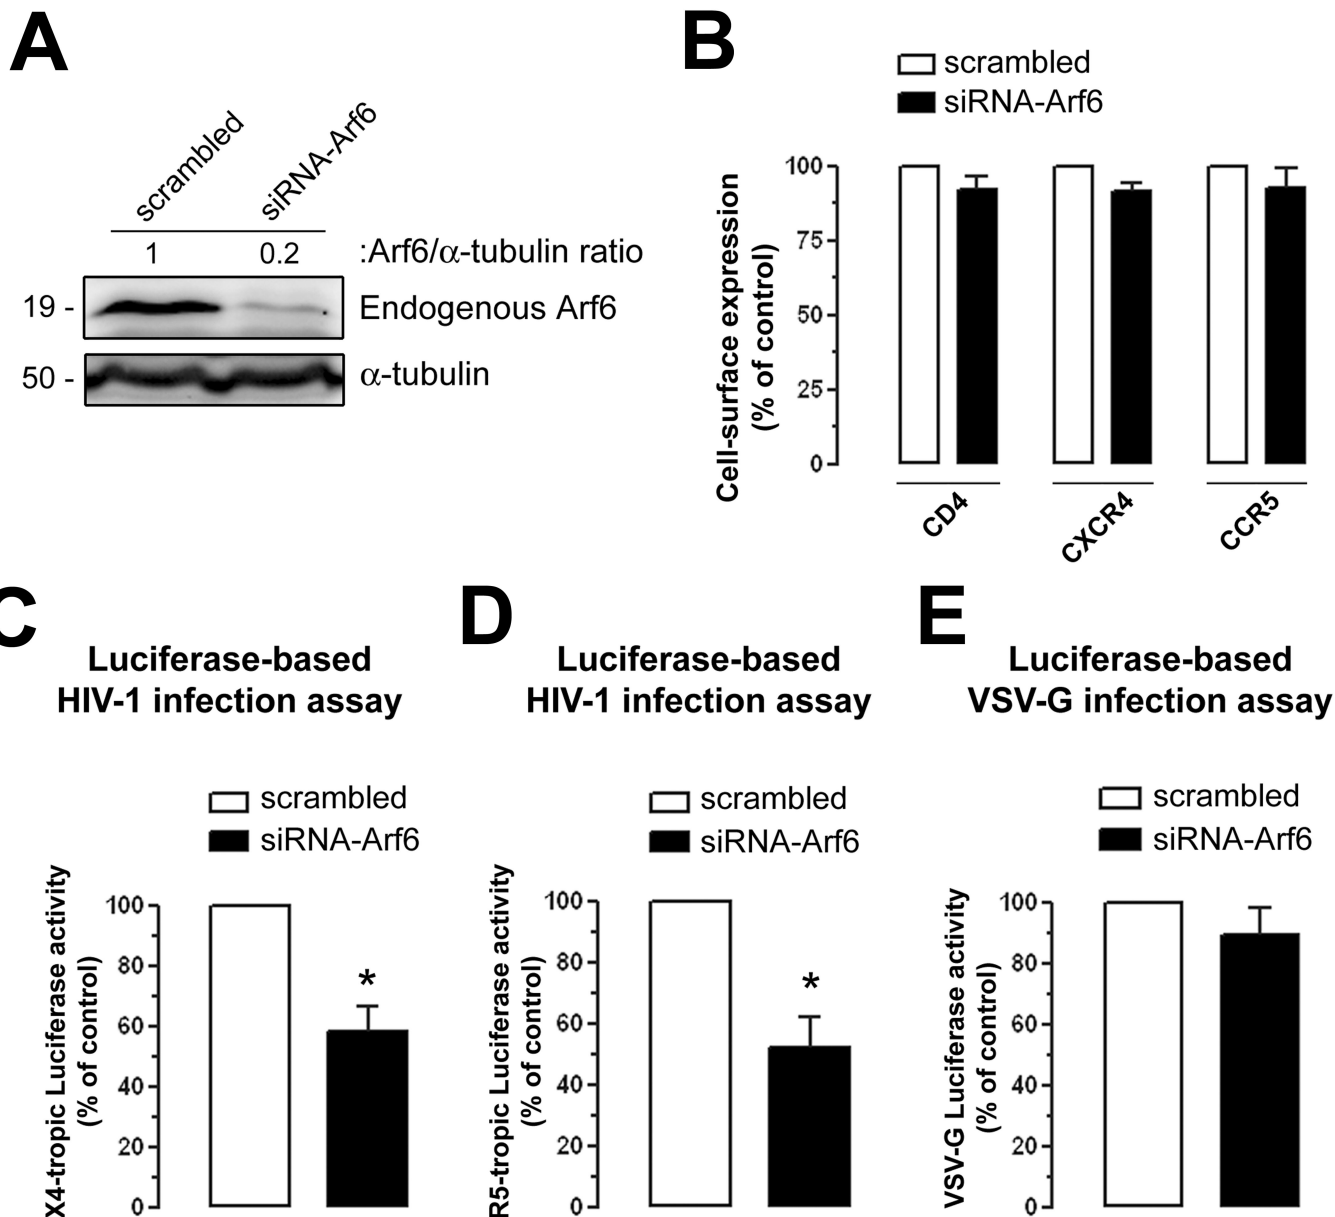

**Figure S4. Effect of specific Arf6 silencing on HIV-1 entry and infection in permissive HeLa cells.** (A) Western-blot analysis of endogenous Arf6 knock-down in HeLa-P5 cells quantified as the band intensity ratios to  $\alpha$ -tubulin. (B) Flow cytometry analysis of CD4, CXCR4 and CCR5 cell-surface expression in Arf6-silenced cells. Data are the mean  $\pm$  SEM of three independent experiments carried out in triplicate. (C and D) Luciferase-based assay of viral entry and infection by with X4- and R5-tropic virus in Arf6-silenced HeLa-P5 cells. Control is defined as 100% viral entry in cells transfected with scrambled oligonucleotides. Data are mean  $\pm$  SEM of three independent experiments carried out in triplicate. Asterisk indicates  $p < 0.05$ ,  $t$  test. (E) VSV-G virions from Luciferase HIV-1 vectors were used to control the specificity of Arf6 knock-down-mediated effects on HIV-1 viral entry and infection (control, defined as 100% viral entry and infection in scrambled-transfected cells). Values are mean  $\pm$  SEM,  $n=9$ .



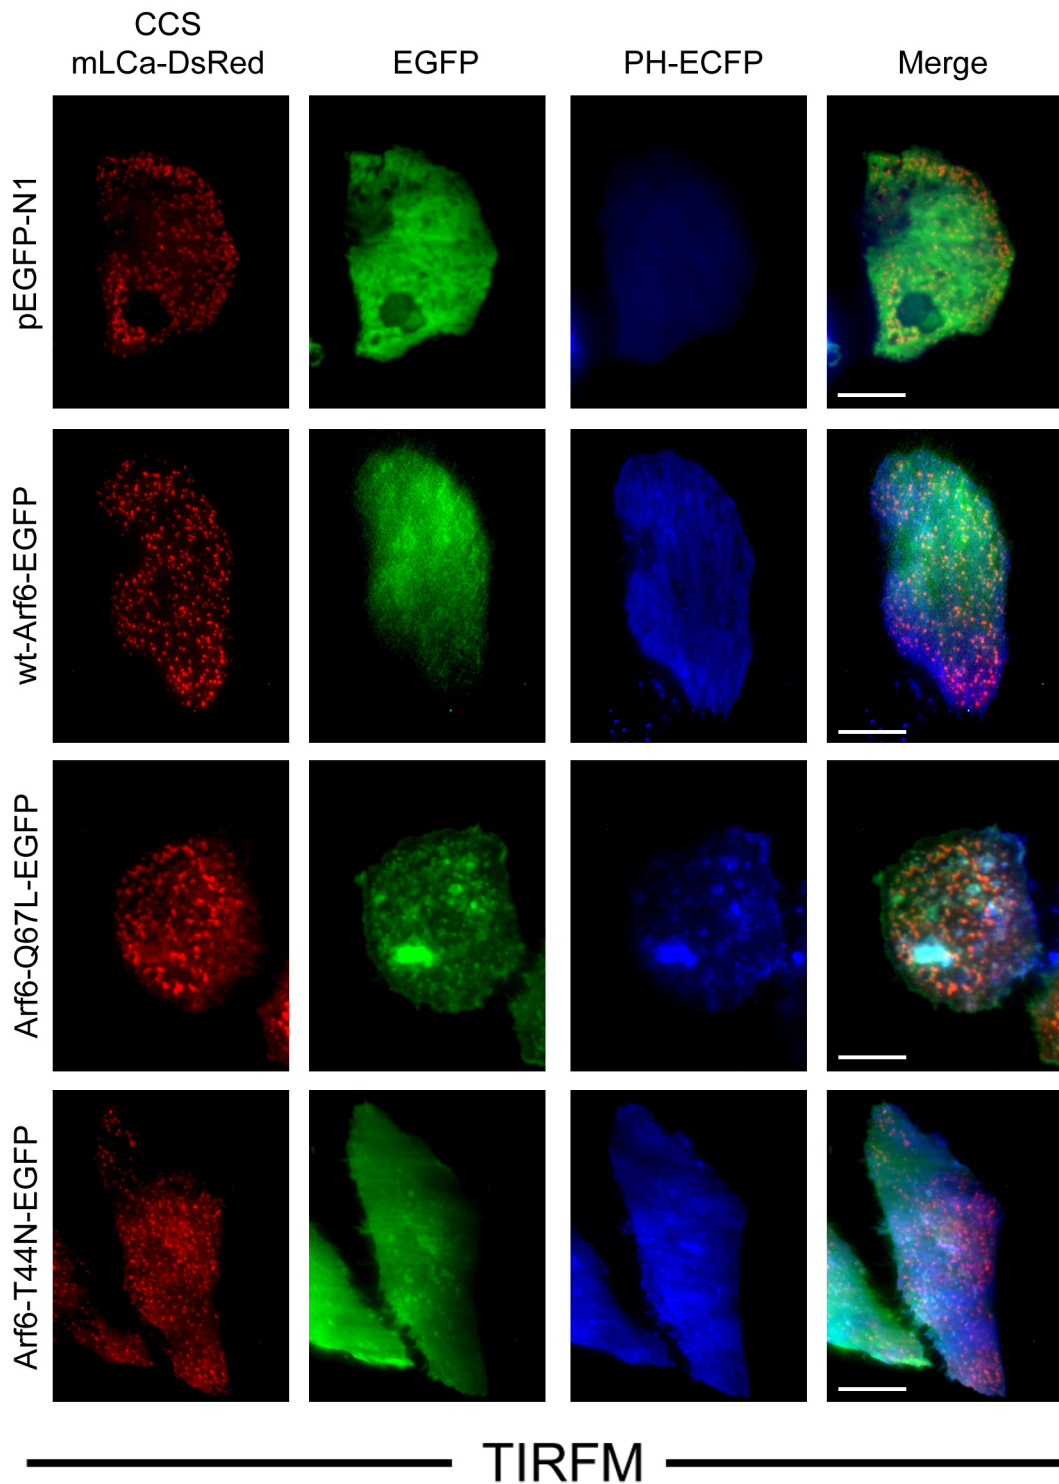

**Figure S5. Clathrin-coated structures (CCS) at the plasma membrane of permissive cells transfected with the different Arf6-EGFP constructs.** A series of TIRFM images showing the expression pattern of clathrin-coated structures (CCS), monitored by fluorescent mLCa-DsRed, at the plasma membrane of permissive TZMbl cells, transiently transfected with each Arf6-EGFP construct. Distribution of Arf6-EGFP constructs and PH-ECFP probe (read-out for PIP<sub>2</sub>) at the EF of cells are shown. Merge images are shown. Bar, 5μm. A representative experiment of three is shown.
